# Supplementary material for: Silver Nanoparticles Protect Skin from Ultraviolet B-Induced Damage in Mice
Source: MDPI journal article supplement (doi:10.3390/ijms21197082), 2020-09-25
Supplement: s1 [file s1]

Supporting information for:

## Silver Nanoparticles Protect Skin from Ultraviolet B-Induced Damage in Mice

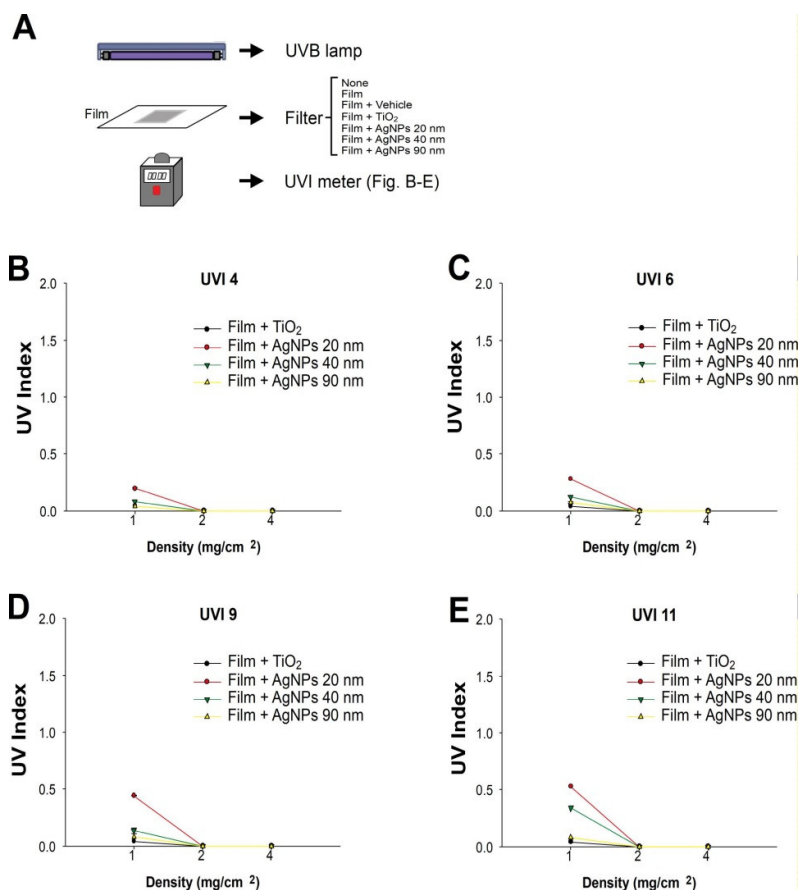

**Figure 1.** Relative UVB-shielding properties of tested nanoparticles (NPs). Graphs illustrated the relative UVB-shielding effects of TiO<sub>2</sub>, and 20, 40, 90 nm AgNPs under UVB irradiations (A) experiment settings, with intensities of UVI 4 (B), 6 (C), 9 (D), 11 (E), respectively.

**A**

1. Vehicle
2. TiO<sub>2</sub>
3. AgNPs

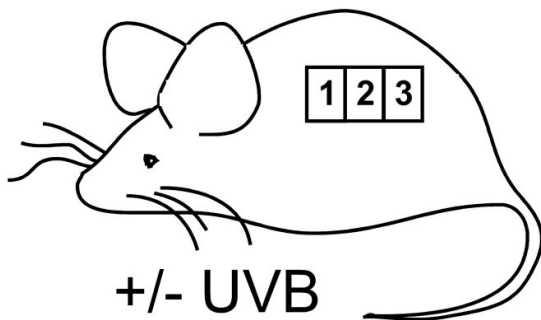

**B**

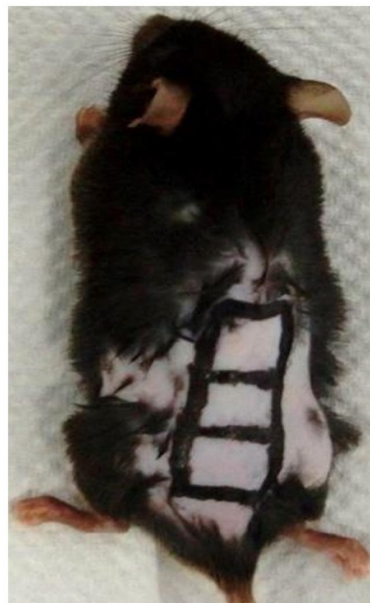

**Figure 2.** UVB-irradiation experiment for mice. The experiment setting (A) and an example of hair removed mouse used in UVB experiments (B).
